# Supplementary material
Source: PubMed Central journal article supplement (PMC6660416)

## Package Transgenic Sindbis Virus (See Extended Protocol A & B)

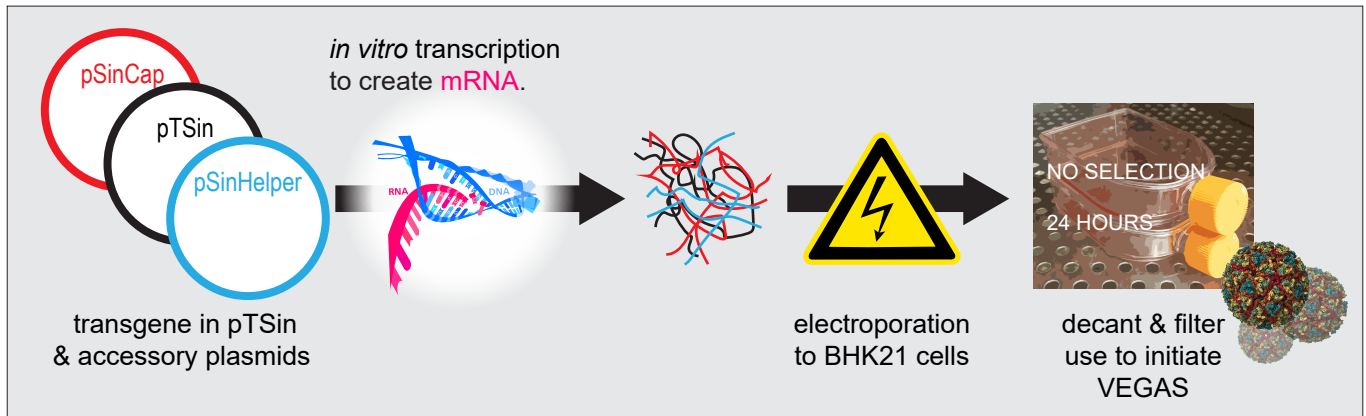

## VEGAS for Directed Evolution of the Transgene (See C & D)

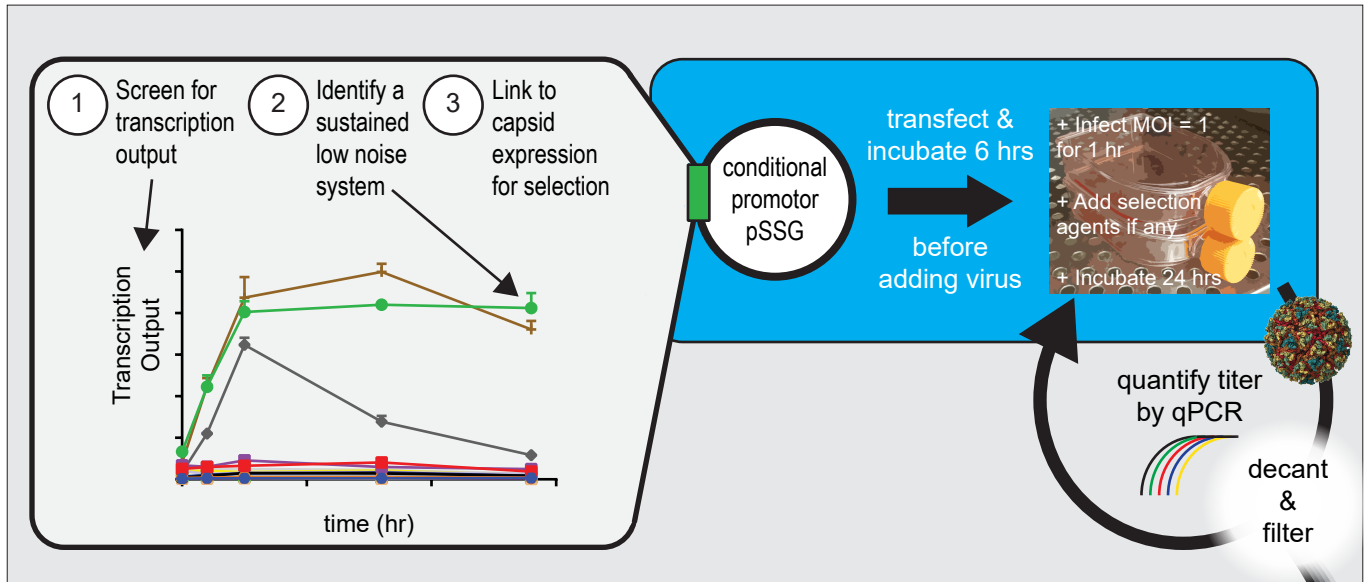

## Isolating VEGAS Evolved Transgenes (See E)

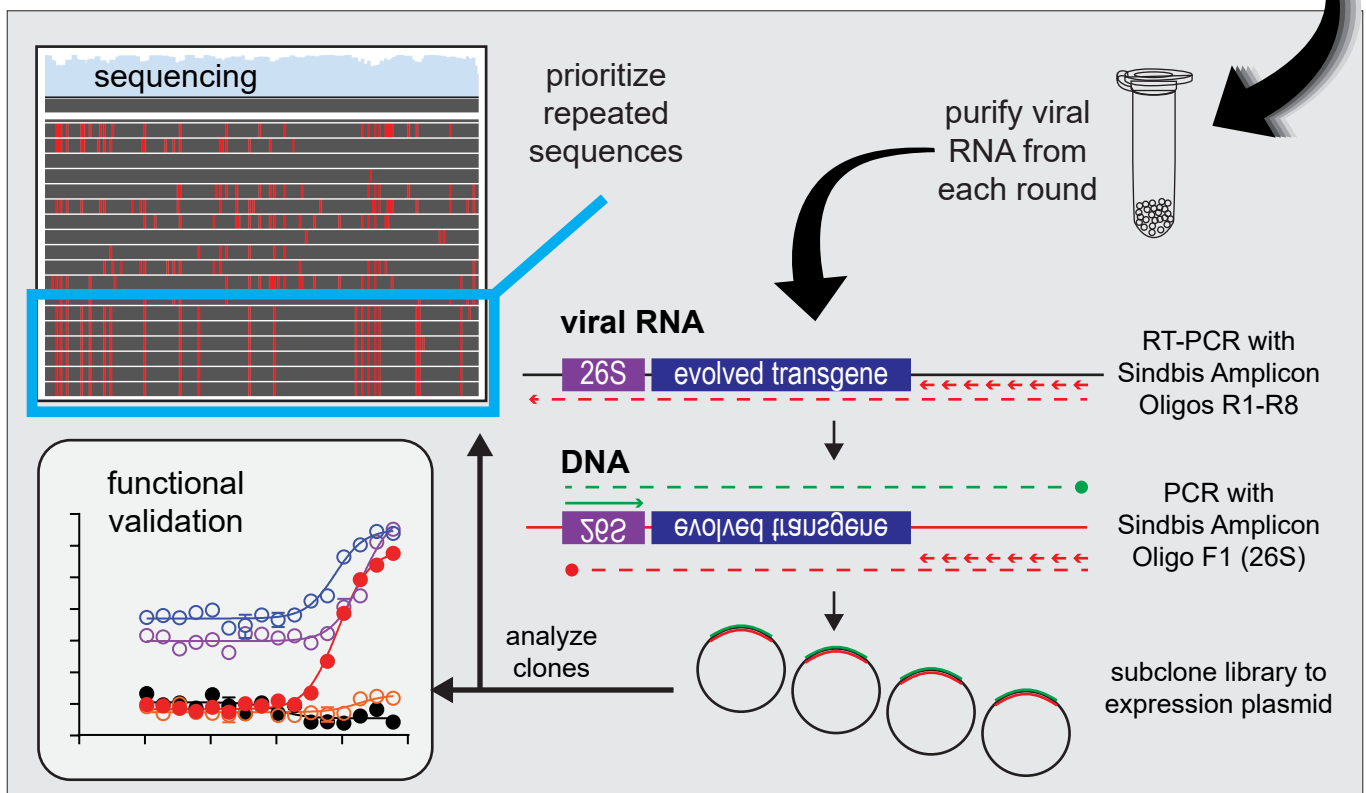

Supplement: NIHMS1530472-supplement-2.pdf [file NIHMS1530472-supplement-2.pdf]
