# Supplementary material
Source: PubMed Central journal article supplement (PMC6660416)

Figure 1 Supplemental

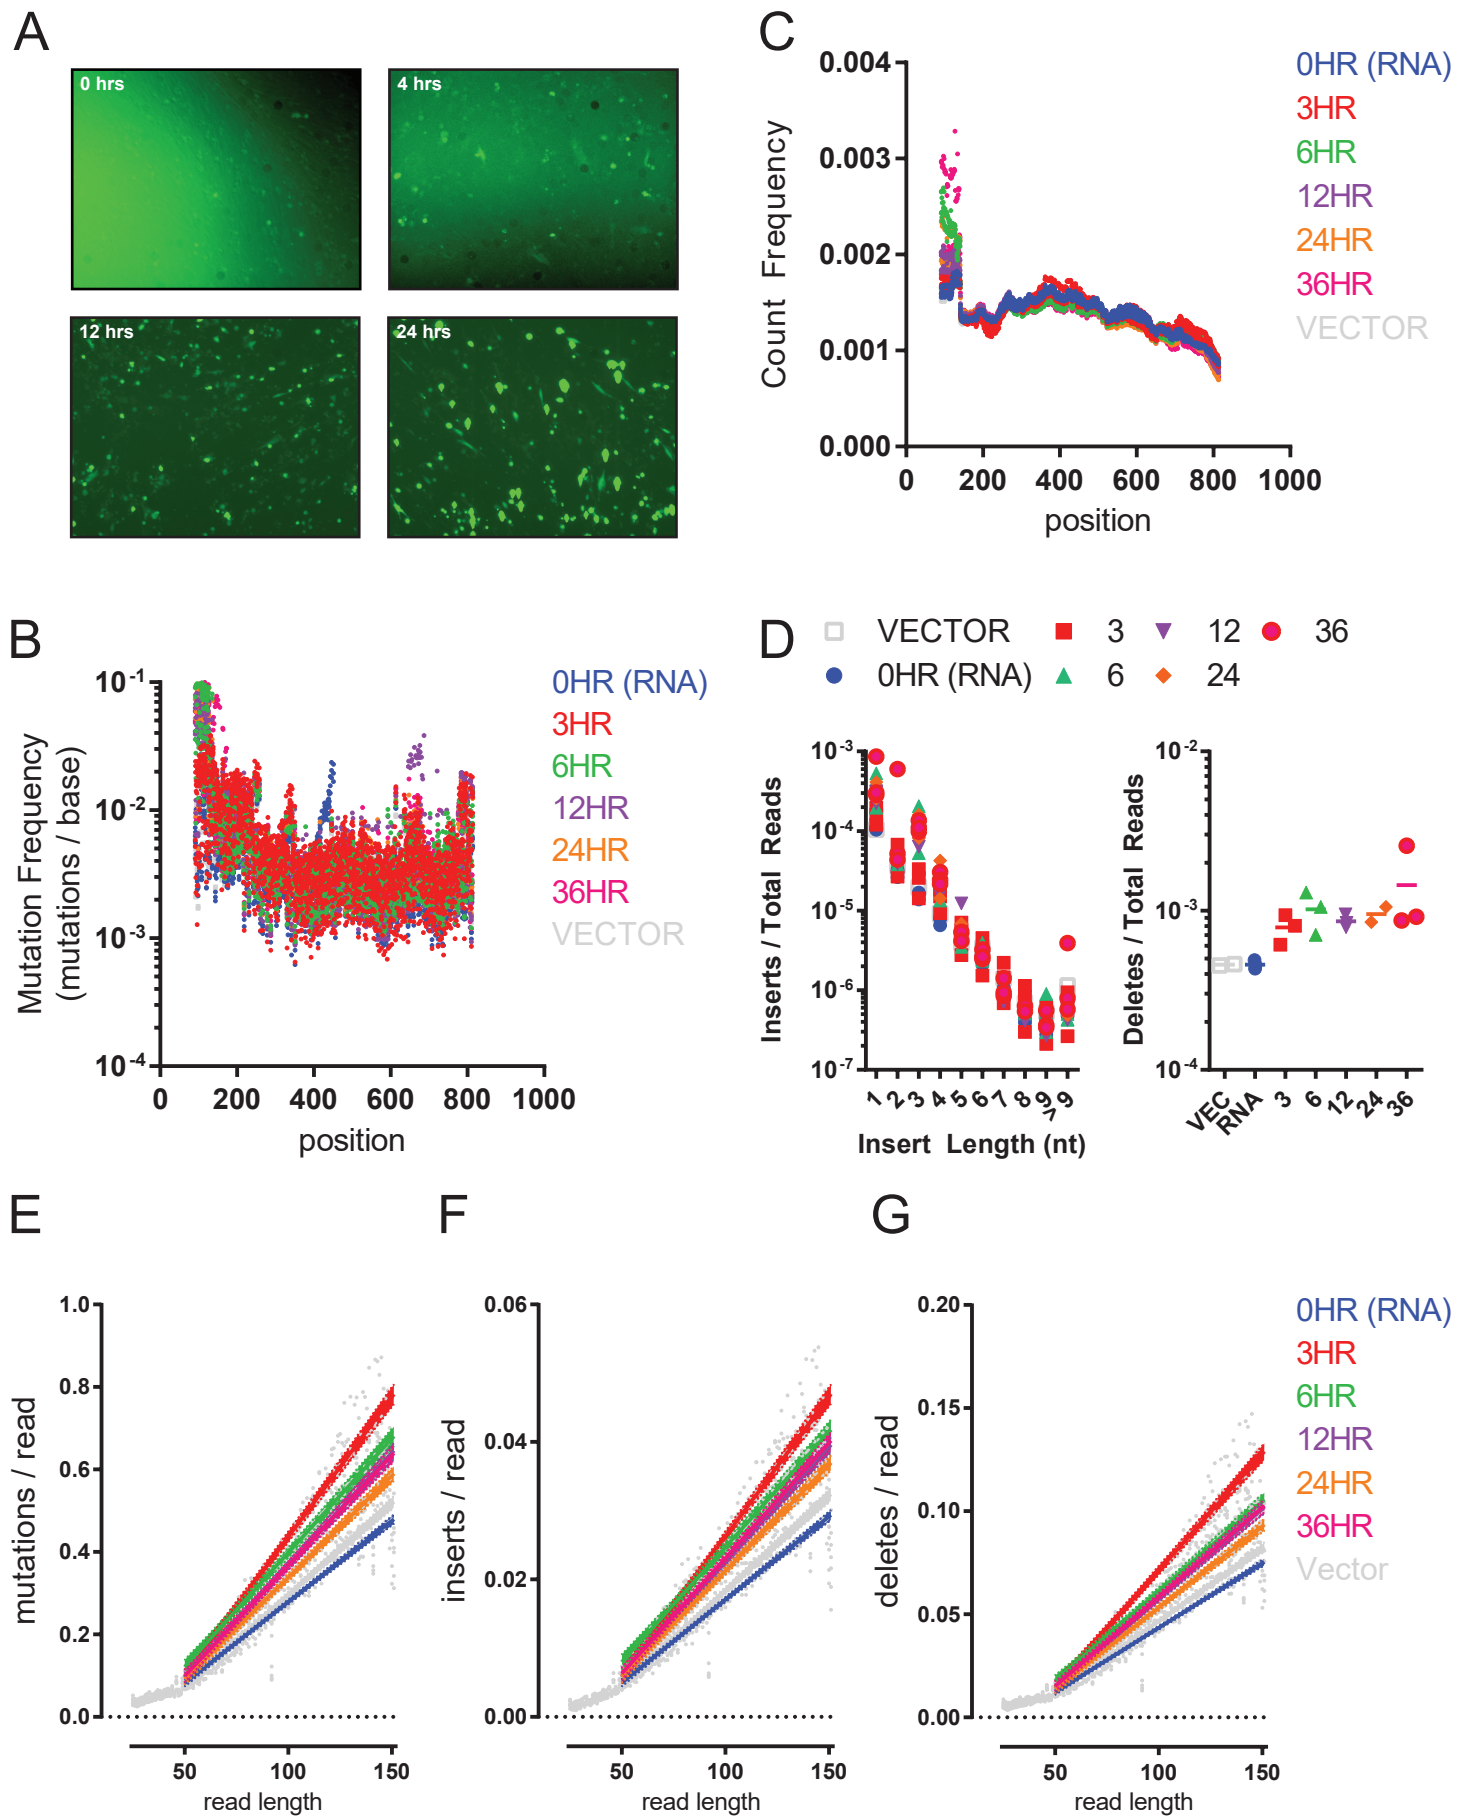

Supplement: NIHMS1530472-supplement-3.pdf [file NIHMS1530472-supplement-3.pdf]

# Figure 3 Supplemental

supp table 2: Kate's, excel

## A

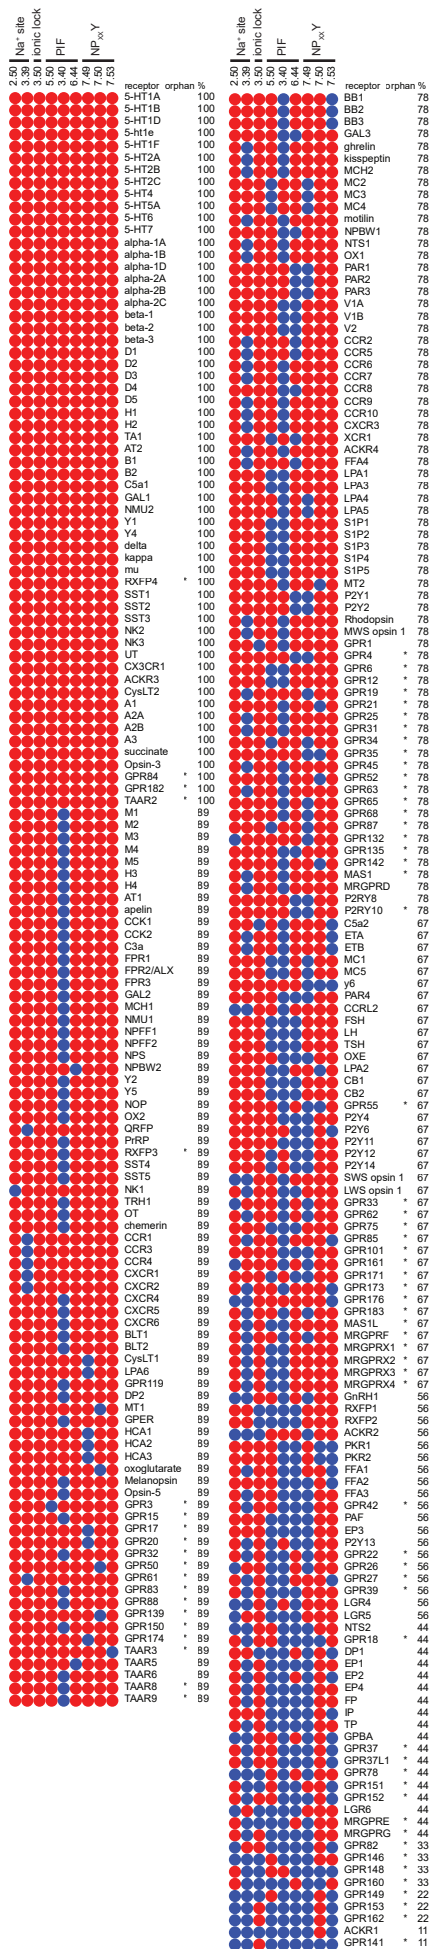

## B

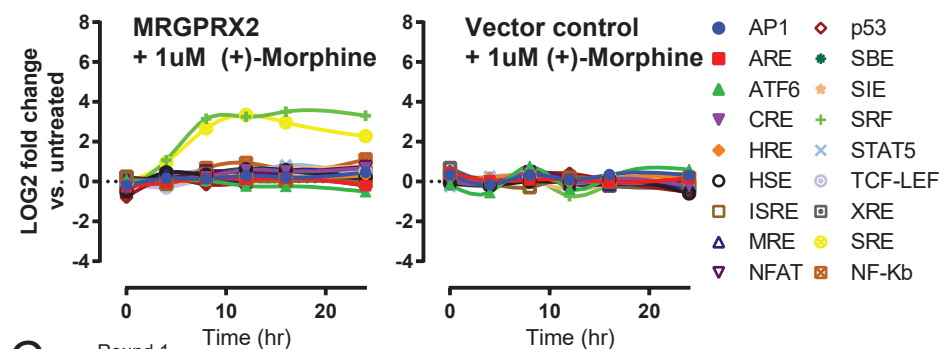

## C

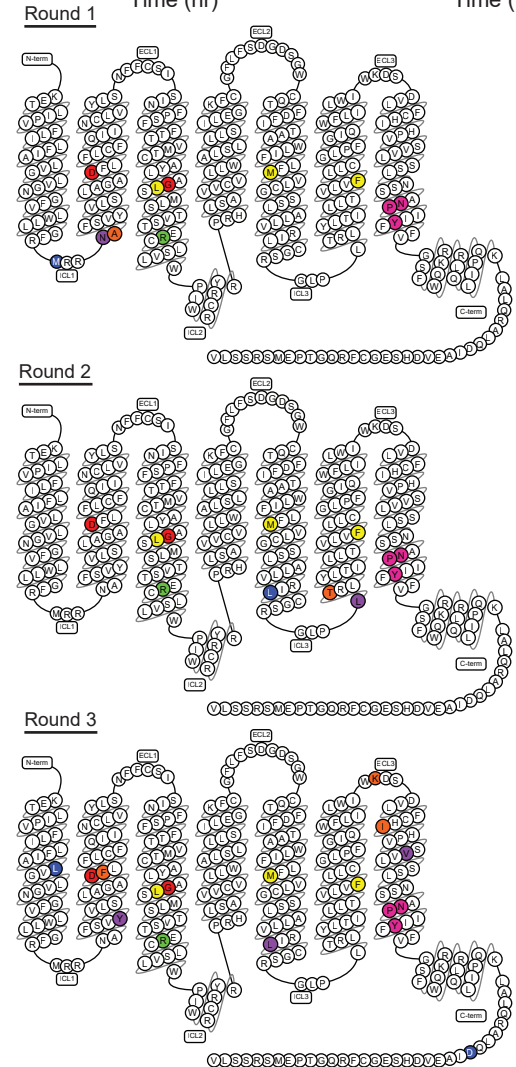

## D

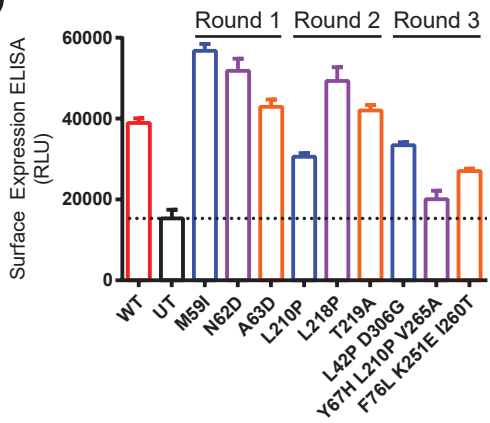

Supplement: NIHMS1530472-supplement-5.pdf [file NIHMS1530472-supplement-5.pdf]

# Figure 4 Supplemental

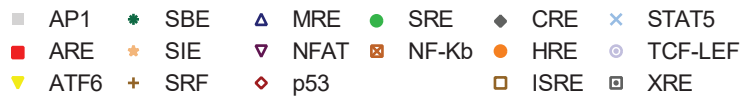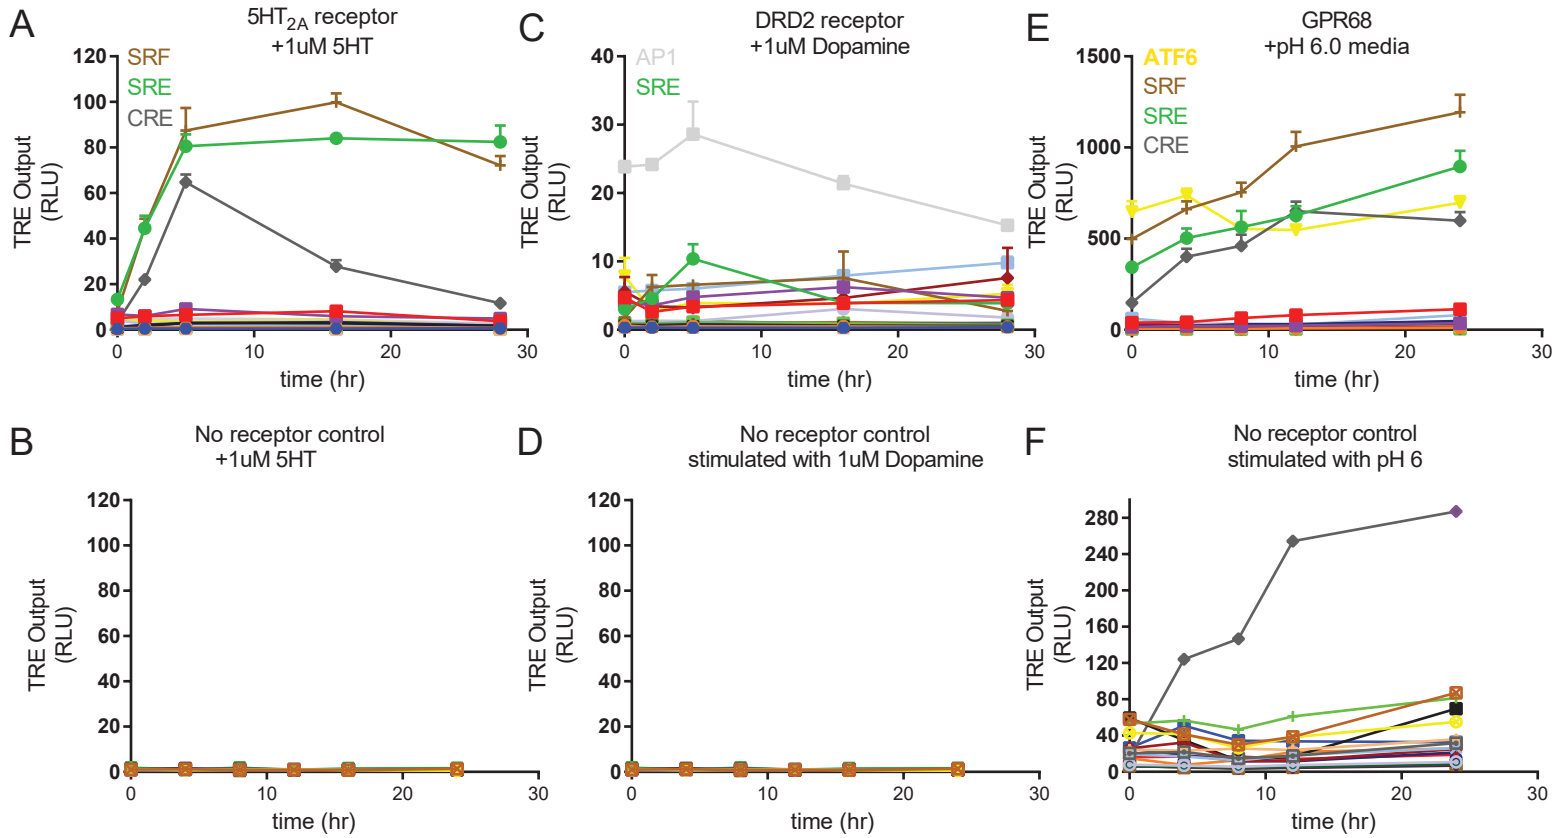

Supplement: NIHMS1530472-supplement-6.pdf [file NIHMS1530472-supplement-6.pdf]

Figure 5 Supplemental

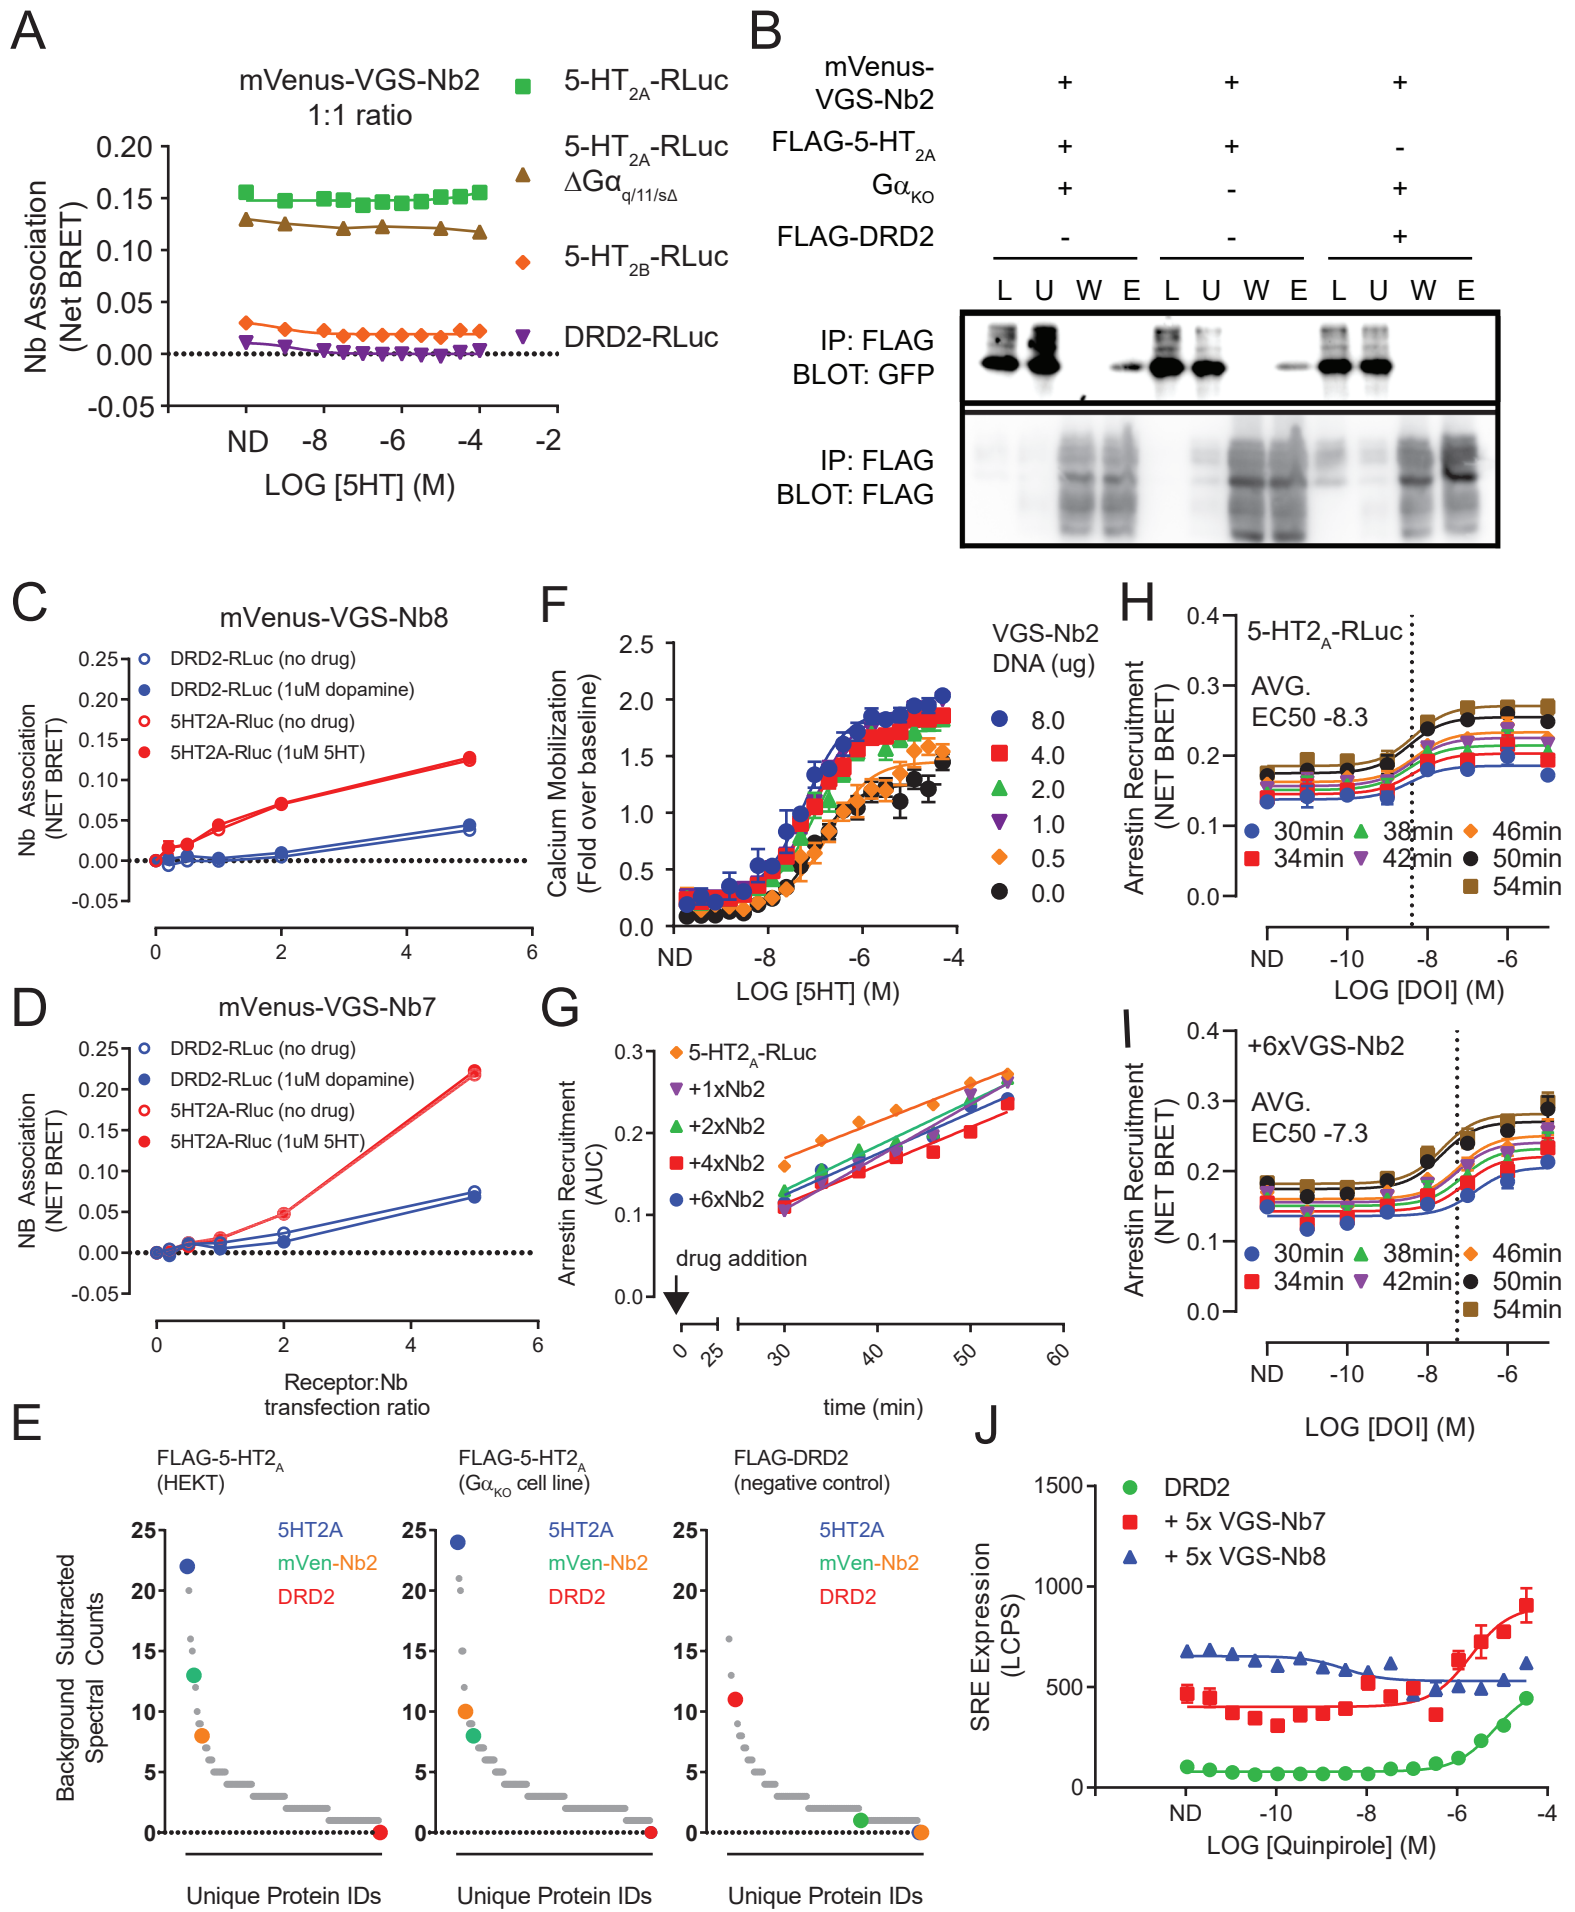

Supplement: NIHMS1530472-supplement-7.pdf [file NIHMS1530472-supplement-7.pdf]
